# Supplementary material
Source: bioRxiv or medRxiv preprint supplement (https://www.medrxiv.org/highwire/filestream/69773/field_highwire_adjunct_files/4/19010140-5.pdf)
Supplement: Supplementary file [file 19010140-5.pdf]

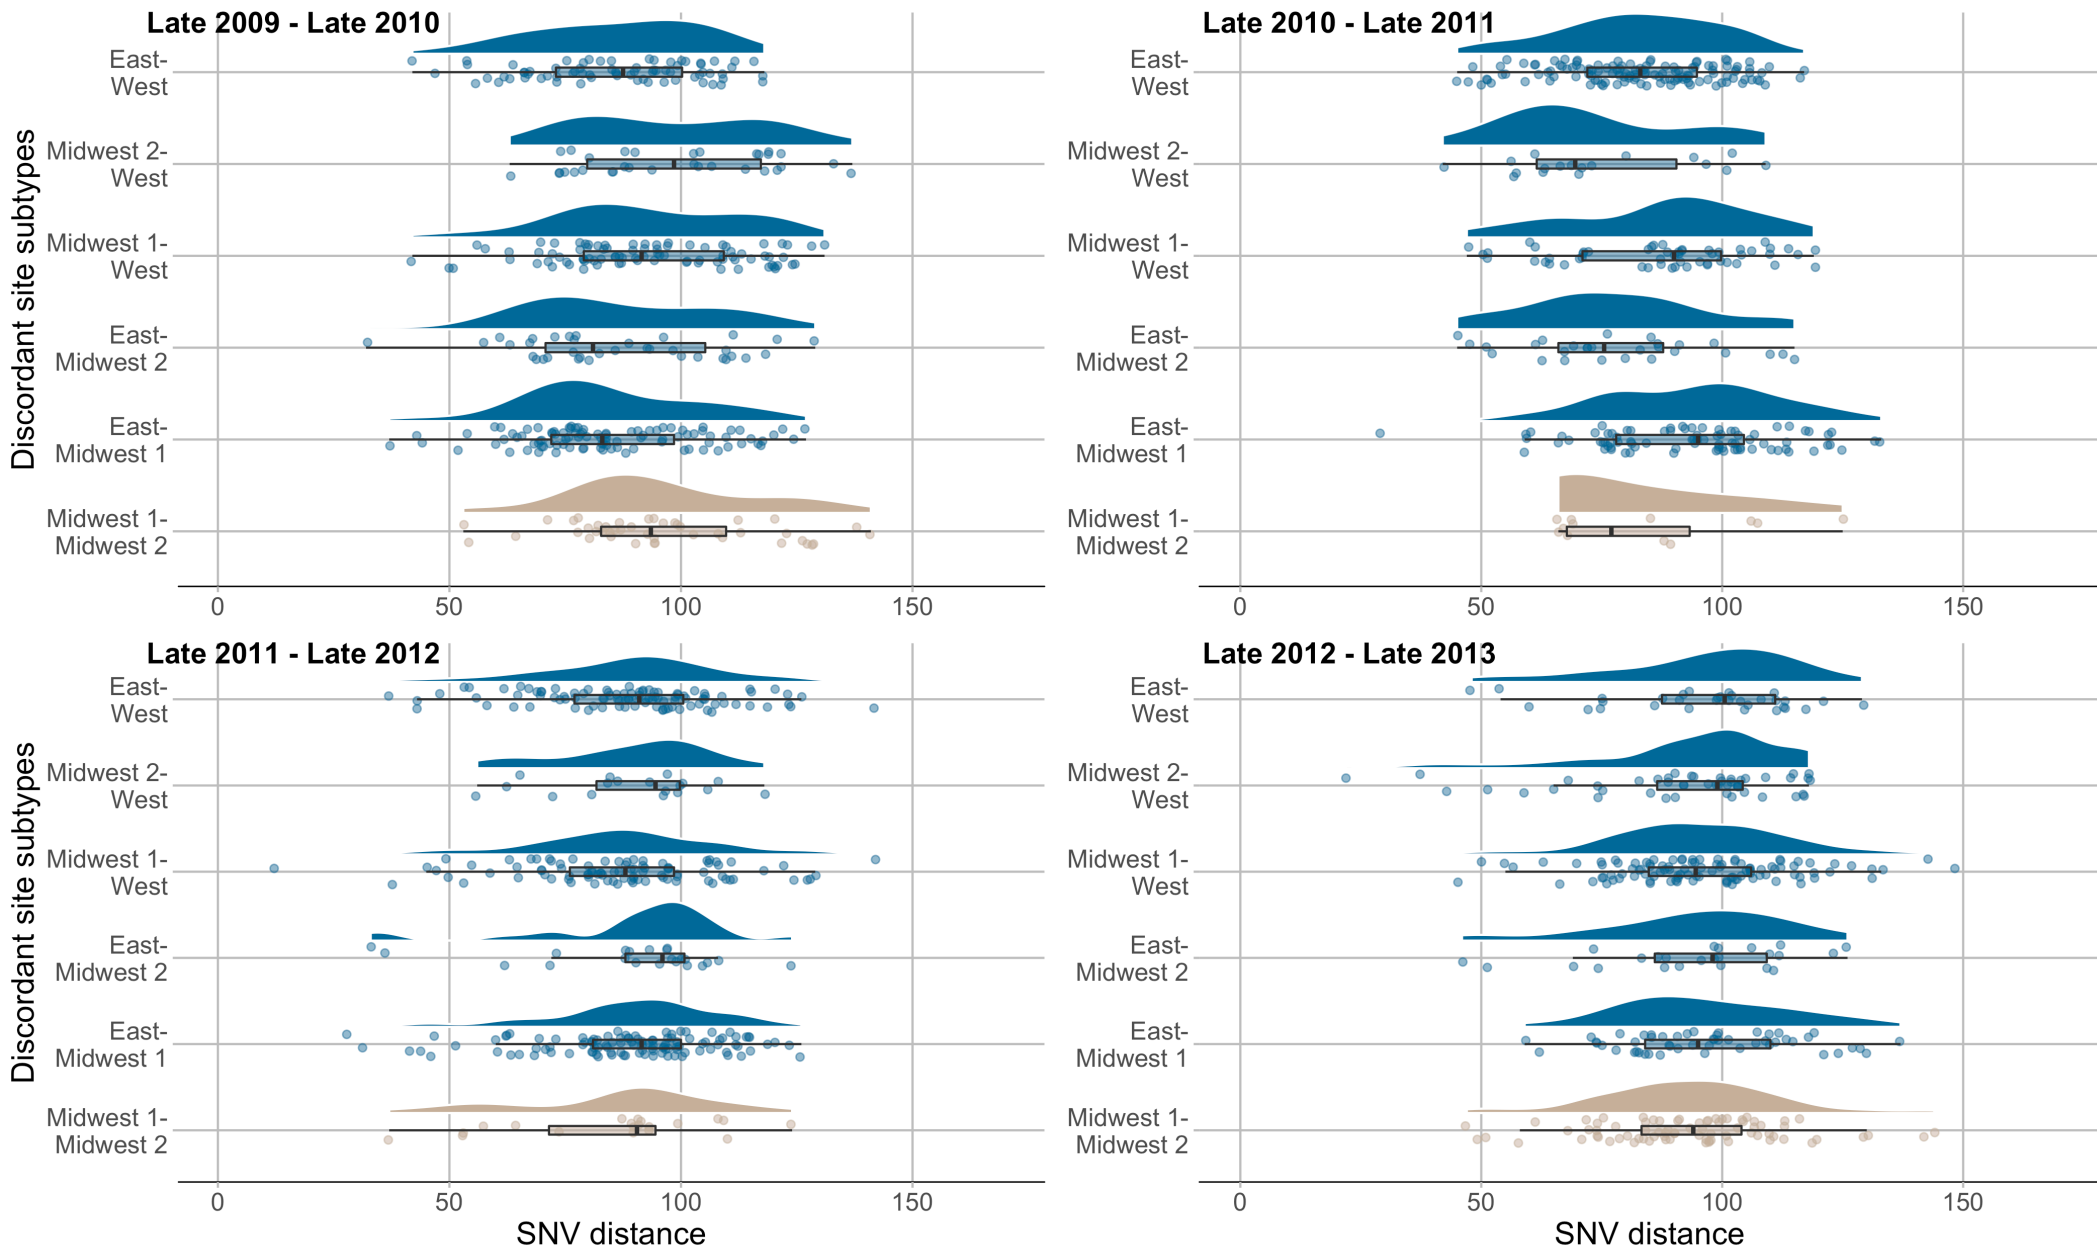

**Supplementary Figure 4: Distribution of pairwise single nucleotide variant (SNV) differences between H30 clinical isolates from four children's hospitals in the U.S. collected from discordant collection sites, stratified by approximate one year intervals. Pairs composed of isolates from the two geographically closest collection sites were compared to pairs composed of isolates from geographically distant collection sites.**
